# Supplementary material
Source: MDPI journal article supplement (https://www.mdpi.com/2073-4344/10/9/1050)
Supplement: s1 [file s1]

# Synthesis of Graphene-Based Biopolymer TiO<sub>2</sub> Electrodes using Pyrolytic Direct Deposition Method and its Catalytic Performance

Parminder Kaur <sup>1,\*</sup>, Sana Frindy <sup>2</sup>, Yuri Park <sup>1</sup>, Mika Sillanpää <sup>3,4,5,\*</sup> and Monzur A. Imteaz <sup>6</sup>

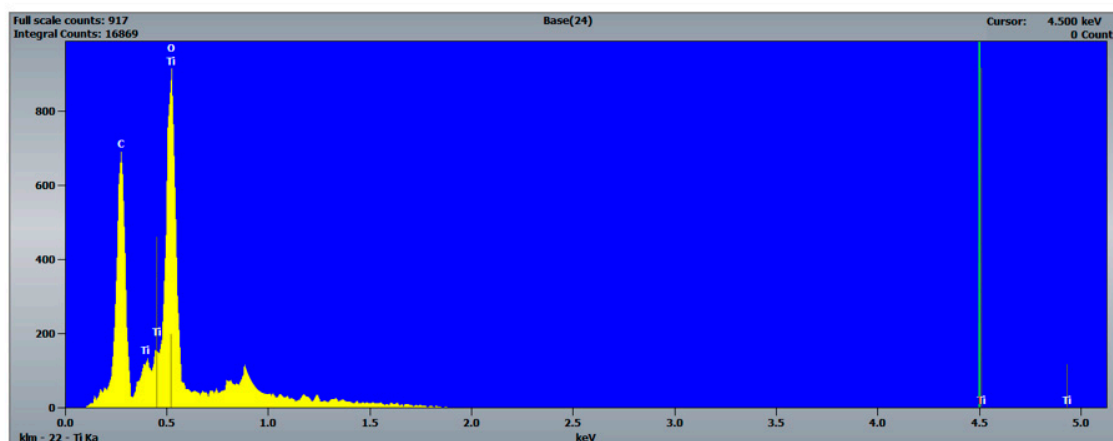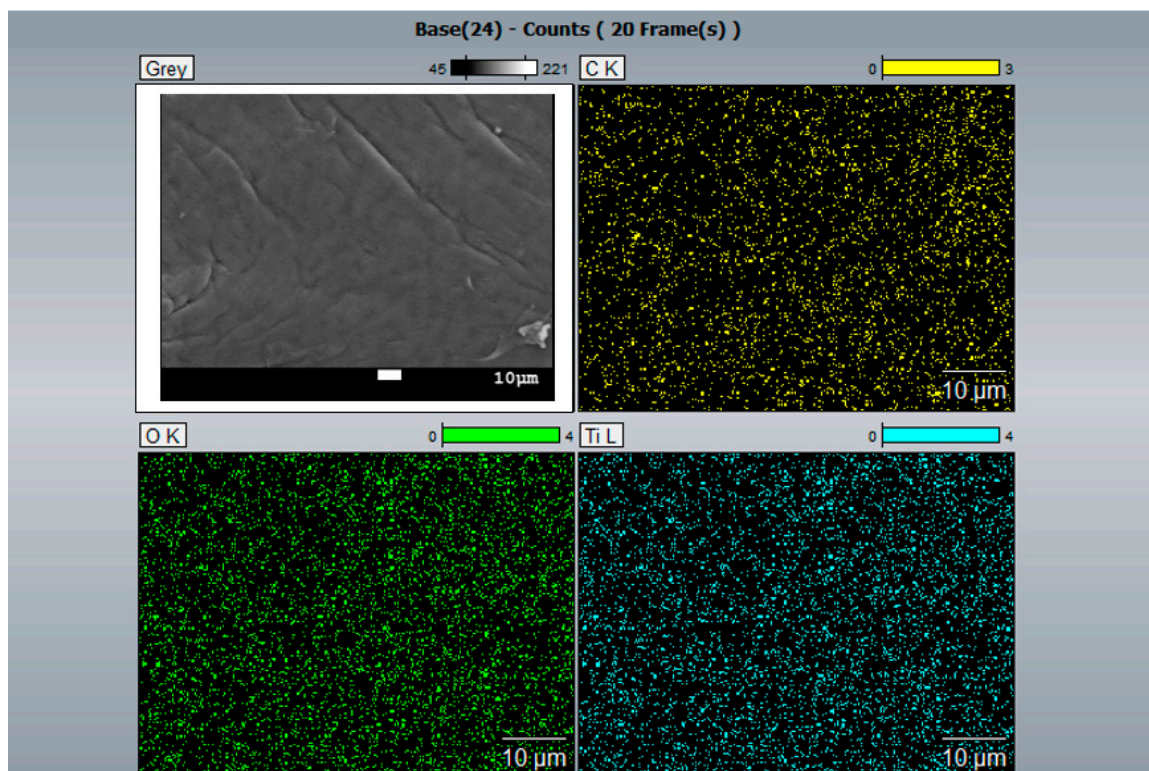

Figure S1. SEM-EDS mapping of synthesized electrodes.

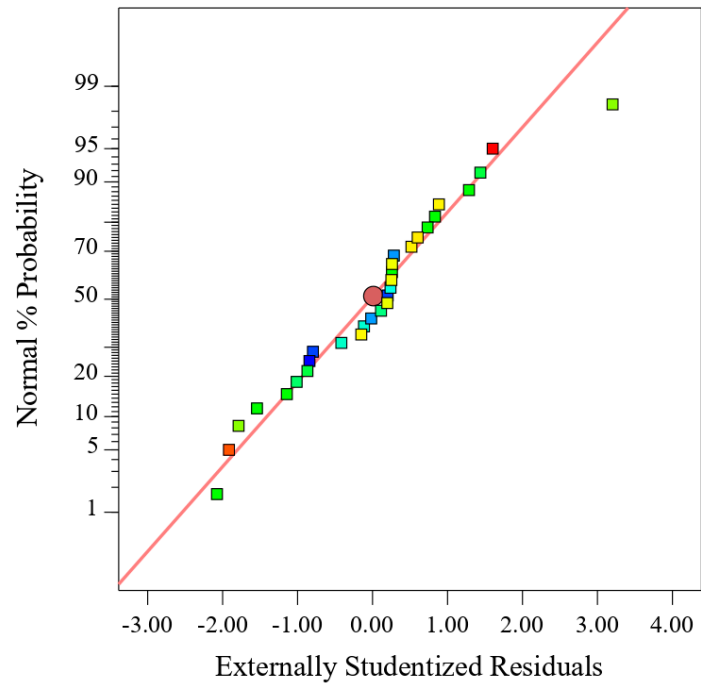

Figure S2. Residual plot for studentized residuals.
